# Supplementary material for: Controlled mechanical properties of poly(ionic liquid)-based hydrophobic ion gels by the introduction of alumina nanoparticles with different shapes
Source: Royal Society of Chemistry journal article supplement (doi:10.1039/d3sm01626a), 2024-01-01
Supplement: d3sm01626a1.pdf [file d3sm01626a1.pdf]

Electronic Supplementary Information (ESI) for

**Controlled mechanical properties of poly(ionic liquid)-based hydrophobic ion gels by the introduction of alumina nanoparticles with different shapes**

Yuna Mizutani<sup>a</sup>, Takaichi Watanabe<sup>a\*</sup>, Carlos G. Lopez<sup>b</sup>, and Tsutomu Ono<sup>a</sup>

<sup>a</sup> Department of Applied Chemistry, Graduate School of Natural Science, Okayama University, 3-1-1,

Tsushima-naka, Kita-ku, Okayama, 700-8530, JAPAN

<sup>b</sup> Department of Materials Science and Engineering, The Pennsylvania State University, University Park,

Pennsylvania 16802, United States

\*Email: wata-t@okayama-u.ac.jp, Phone: +81-86-251-8072

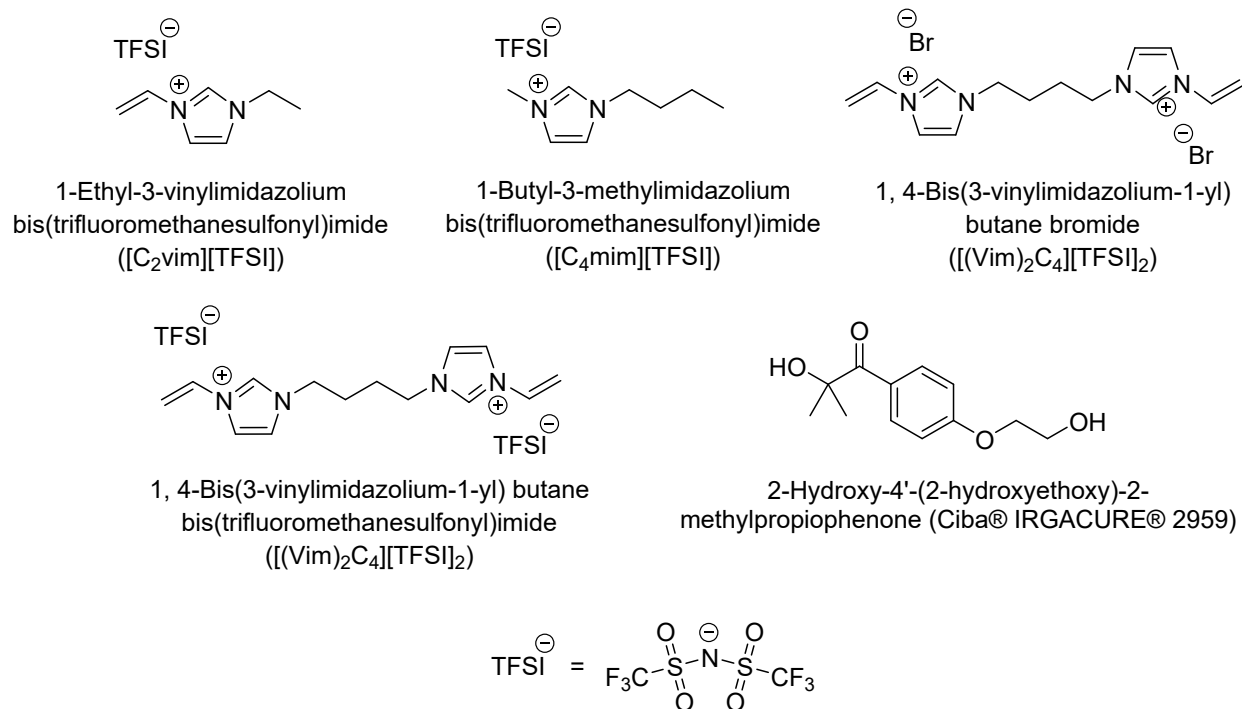

**Figure S1** Chemical structures of reagents used for preparing PIL ion gels.

**Scheme S1** Synthesis of [(Vim)<sub>2</sub>C<sub>4</sub>Br]<sub>2</sub> and [(Vim)<sub>2</sub>C<sub>4</sub>][TFSI]<sub>2</sub>

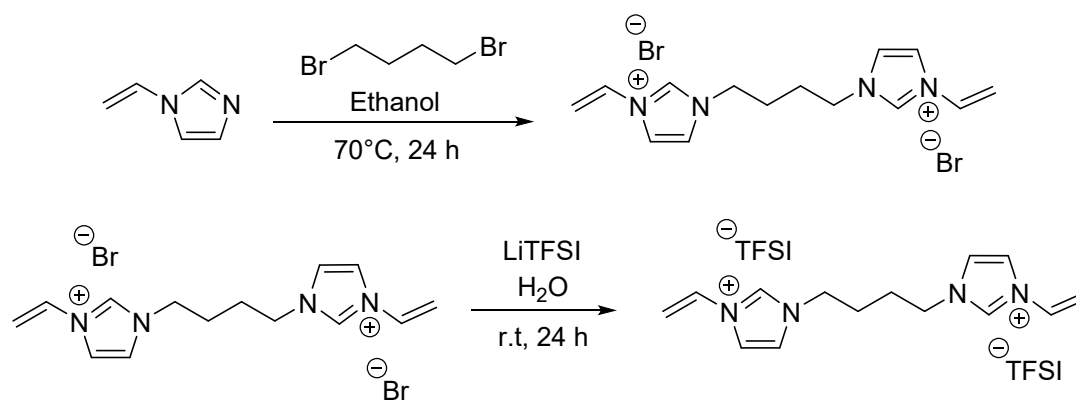

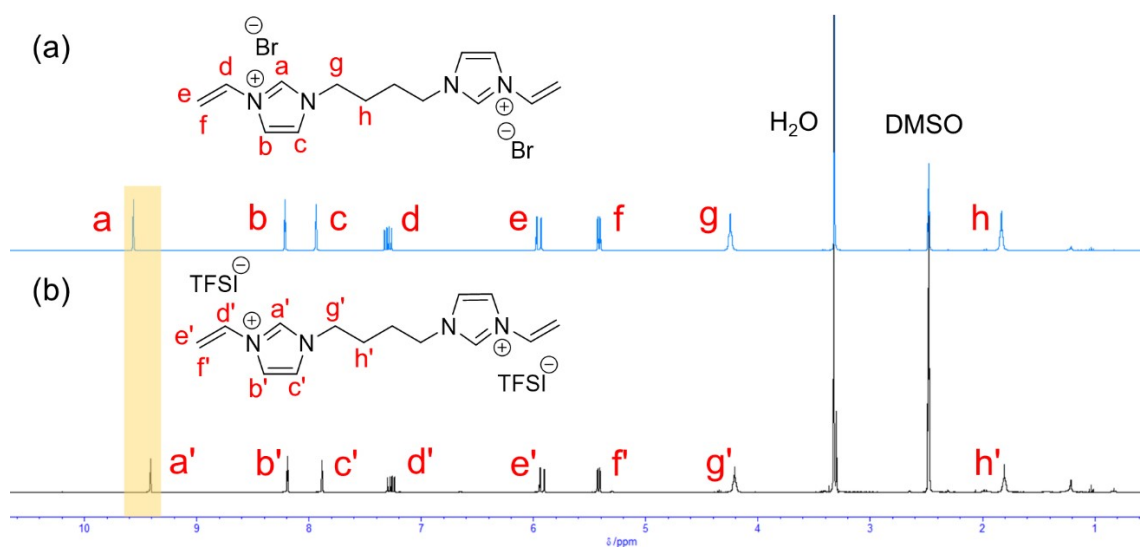

**Figure S2**  $^1\text{H}$  NMR spectra of (a)  $[(\text{Vim})_2\text{C}_4]\text{Br}_2$  and (b)  $[(\text{Vim})_2\text{C}_4][\text{TFSI}]_2$ . (Solvent:  $\text{DMSO}-d_6$ ).

**Table S1** Amount of reagent used for spherical alumina/ $[\text{C}_4\text{mim}][\text{TFSI}]$ /Ethyl acetate (EA) dispersion.

| IL<br>$[\text{C}_4\text{mim}][\text{TFSI}]$<br>[g] | Total EA<br>[mL] | Alumina |                      |
|----------------------------------------------------|------------------|---------|----------------------|
|                                                    |                  | [g]     | [vol%]* <sup>1</sup> |
| 3.5                                                | 1.2              | 0.12    | 0.85                 |
| 3.5                                                | 1.2              | 0.24    | 1.7                  |
| 3.5                                                | 1.2              | 0.36    | 2.5                  |

\*<sup>1</sup> Alumina [vol%] is a concentration for the whole solution.

**Table S2** Amount of reagent used for rod-shaped alumina/ $[\text{C}_4\text{mim}][\text{TFSI}]$ /EA dispersion.

| IL<br>$[\text{C}_4\text{mim}][\text{TFSI}]$<br>[g] | EA dispersed<br>alumina* <sup>1</sup><br>[g] | Evaporated EA<br>[mL] | Added EA<br>[mL] | Total EA<br>[mL] | Alumina<br>[g] | [vol%]* <sup>2</sup> |
|----------------------------------------------------|----------------------------------------------|-----------------------|------------------|------------------|----------------|----------------------|
| 3.5                                                | 1.2                                          | 0.66                  | 0.59             | 1.2              | 0.12           | 0.85                 |
| 3.5                                                | 2.4                                          | 1.8                   | 0.57             | 1.2              | 0.24           | 1.7                  |
| 3.5                                                | 3.6                                          | 2.7                   | 0.26             | 1.2              | 0.36           | 2.5                  |

\*<sup>1</sup> Alumina concentration in EA dispersed alumina is 10 wt%.

\*<sup>2</sup> Alumina [vol%] is a concentration for the whole solution.

**Table S3** Amount of reagent used for PIL SN ion gels and spherical or rod-shaped alumina/PIL DN ion gels with different crosslinker concentrations.

| Monomer | Cross-linking agent* <sup>1</sup> |                                                         | Initiator* <sup>2</sup> | IL  | Total | Alumina* <sup>3</sup> |        |       |
|---------|-----------------------------------|---------------------------------------------------------|-------------------------|-----|-------|-----------------------|--------|-------|
|         | [C <sub>2</sub> vim][TFSI]        | [(Vim) <sub>2</sub> C <sub>4</sub> ][TFSI] <sub>2</sub> |                         |     |       | [g]                   | [mol%] | [g]   |
| [g]     | [g]                               | [mol%]                                                  | [g]                     | [g] | [mL]  | Shape                 | [g]    | [wt%] |
| 3.0     | 0.021                             | 0.35                                                    | 0.0016                  | 3.5 | 1.2   | -                     | 0      | 0     |
| 3.0     | 0.042                             | 0.70                                                    | 0.0016                  | 3.5 | 1.2   | -                     | 0      | 0     |
| 3.0     | 0.060                             | 1.0                                                     | 0.0016                  | 3.5 | 1.2   | -                     | 0      | 0     |
| 3.0     | 0.021                             | 0.35                                                    | 0.0016                  | 3.5 | 1.2   | Spherical             | 0.24   | 8.0   |
| 3.0     | 0.042                             | 0.70                                                    | 0.0016                  | 3.5 | 1.2   | Spherical             | 0.24   | 8.0   |
| 3.0     | 0.060                             | 1.0                                                     | 0.0016                  | 3.5 | 1.2   | Spherical             | 0.24   | 8.0   |
| 3.0     | 0.021                             | 0.35                                                    | 0.0016                  | 3.5 | 1.2   | Rod-shaped            | 0.24   | 8.0   |
| 3.0     | 0.042                             | 0.70                                                    | 0.0016                  | 3.5 | 1.2   | Rod-shaped            | 0.24   | 8.0   |
| 3.0     | 0.060                             | 1.0                                                     | 0.0016                  | 3.5 | 1.2   | Rod-shaped            | 0.24   | 8.0   |

\*<sup>1</sup> Cross-linking agent [mol%] is monomer basis.

\*<sup>2</sup> Initiator is 0.1 mol% on monomer basis.

\*<sup>3</sup> Alumina [wt%] is PIL network (monomer + cross-linking agent + initiator) basis.

**Table S4** Amount of reagent used for spherical alumina/PIL DN ion gels with different alumina concentrations.

| Monomer                    | Cross-linking agent* <sup>1</sup>                       | Initiator* <sup>2</sup> | IL                         | Total | Alumina* <sup>3</sup> |       |
|----------------------------|---------------------------------------------------------|-------------------------|----------------------------|-------|-----------------------|-------|
| [C <sub>2</sub> vim][TFSI] | [(Vim) <sub>2</sub> C <sub>4</sub> ][TFSI] <sub>2</sub> | Irgacure2959            | [C <sub>4</sub> mim][TFSI] | EA    | [g]                   | [wt%] |
| [g]                        | [g]                                                     | [g]                     | [g]                        | [mL]  | [g]                   | [wt%] |
| 3.0                        | 0.021                                                   | 0.0016                  | 3.5                        | 1.2   | 0                     | 0     |
| 3.0                        | 0.021                                                   | 0.0016                  | 3.5                        | 1.2   | 0.12                  | 4.0   |
| 3.0                        | 0.021                                                   | 0.0016                  | 3.5                        | 1.2   | 0.18                  | 6.0   |
| 3.0                        | 0.021                                                   | 0.0016                  | 3.5                        | 1.2   | 0.24                  | 8.0   |
| 3.0                        | 0.021                                                   | 0.0016                  | 3.5                        | 1.2   | 0.30                  | 10    |
| 3.0                        | 0.021                                                   | 0.0016                  | 3.5                        | 1.2   | 0.36                  | 12    |
| 3.0                        | 0.021                                                   | 0.0016                  | 3.5                        | 1.2   | 0.42                  | 14    |

\*<sup>1</sup> Cross-linking agent is 0.35 mol% on monomer basis.

\*<sup>2</sup> Initiator is 0.1 mol% on monomer basis.

\*<sup>3</sup> Alumina [wt%] is PIL network (monomer + cross-linking agent + initiator) basis.

**Table S5** Amount of reagent used for rod-shaped alumina/PIL DN ion gels with different alumina concentrations.

| Monomer                    | Cross-linking agent* <sup>1</sup>                       | Initiator* <sup>2</sup> | IL                         | EA dispersed alumina* <sup>3</sup> | Total EA | Alumina* <sup>4</sup> |       |
|----------------------------|---------------------------------------------------------|-------------------------|----------------------------|------------------------------------|----------|-----------------------|-------|
| [C <sub>2</sub> vim][TFSI] | [(Vim) <sub>2</sub> C <sub>4</sub> ][TFSI] <sub>2</sub> | Irgacure2959            | [C <sub>4</sub> mim][TFSI] | EA dispersed alumina* <sup>3</sup> | EA       | [g]                   | [wt%] |
| [g]                        | [g]                                                     | [g]                     | [g]                        | [g]                                | [mL]     | [g]                   | [wt%] |
| 3.0                        | 0.021                                                   | 0.0016                  | 3.5                        | 1.2                                | 1.2      | 0.12                  | 4.0   |
| 3.0                        | 0.021                                                   | 0.0016                  | 3.5                        | 1.8                                | 1.2      | 0.18                  | 6.0   |
| 3.0                        | 0.021                                                   | 0.0016                  | 3.5                        | 2.4                                | 1.2      | 0.24                  | 8.0   |
| 3.0                        | 0.021                                                   | 0.0016                  | 3.5                        | 3.0                                | 1.2      | 0.30                  | 10    |
| 3.0                        | 0.021                                                   | 0.0016                  | 3.5                        | 3.6                                | 1.2      | 0.36                  | 12    |
| 3.0                        | 0.021                                                   | 0.0016                  | 3.5                        | 4.2                                | 1.2      | 0.42                  | 14    |

\*<sup>1</sup> Cross-linking agent is 0.35 mol% on monomer basis.

\*<sup>2</sup> Initiator is 0.1 mol% on monomer basis.

\*<sup>3</sup> Alumina concentration in EA dispersed alumina is 10 wt%.

\*<sup>4</sup> Alumina [wt%] is PIL network (monomer + cross-linking agent + initiator) basis.

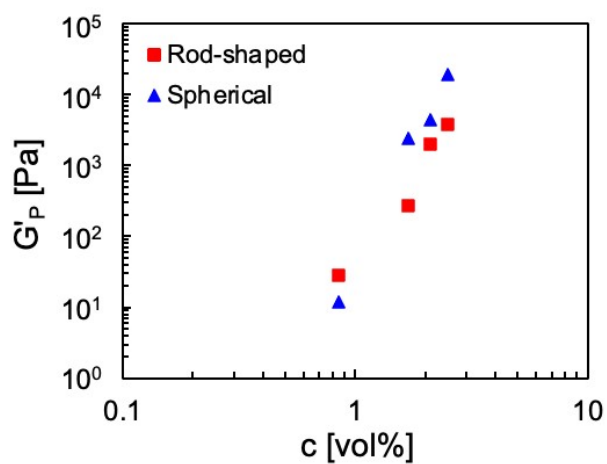

**Figure S3** Values of the low frequency plateau of the storage modulus ( $G'_p$ ) at versus the volume concentration of alumina in alumina/[C<sub>4</sub>mim][TFSI]/EA dispersion (strain = 0.1%, frequency = 1 Hz).

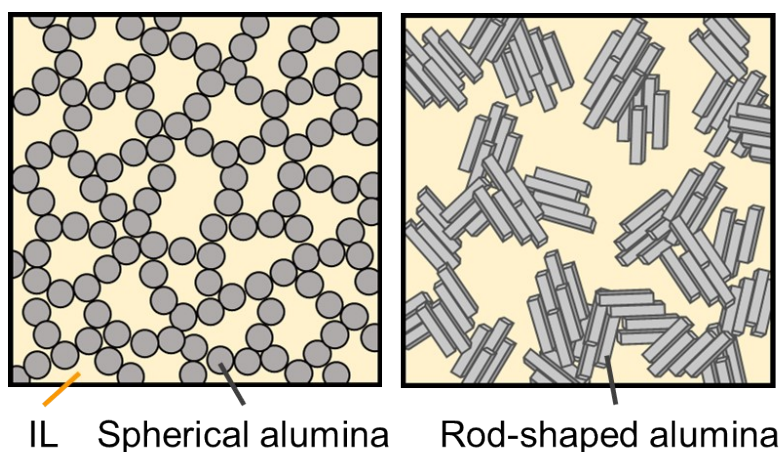

**Scheme S2** Schematic illustrations of alumina dispersed in [C<sub>4</sub>mim][TFSI]/EA solution.

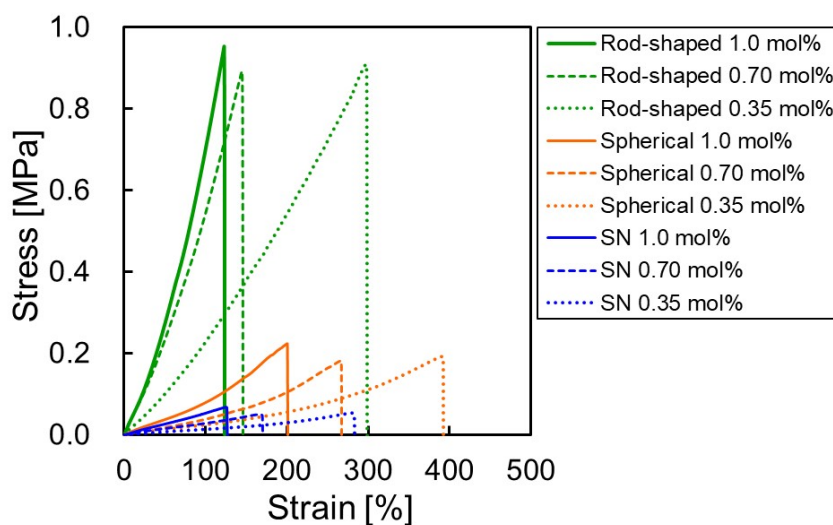

**Figure S4** Stress–strain curves of SN ion gels, spherical and rod-shaped alumina/PIL DN ion gels with different crosslinker concentrations. The alumina concentration was fixed at 8 wt% relative to the PIL network.

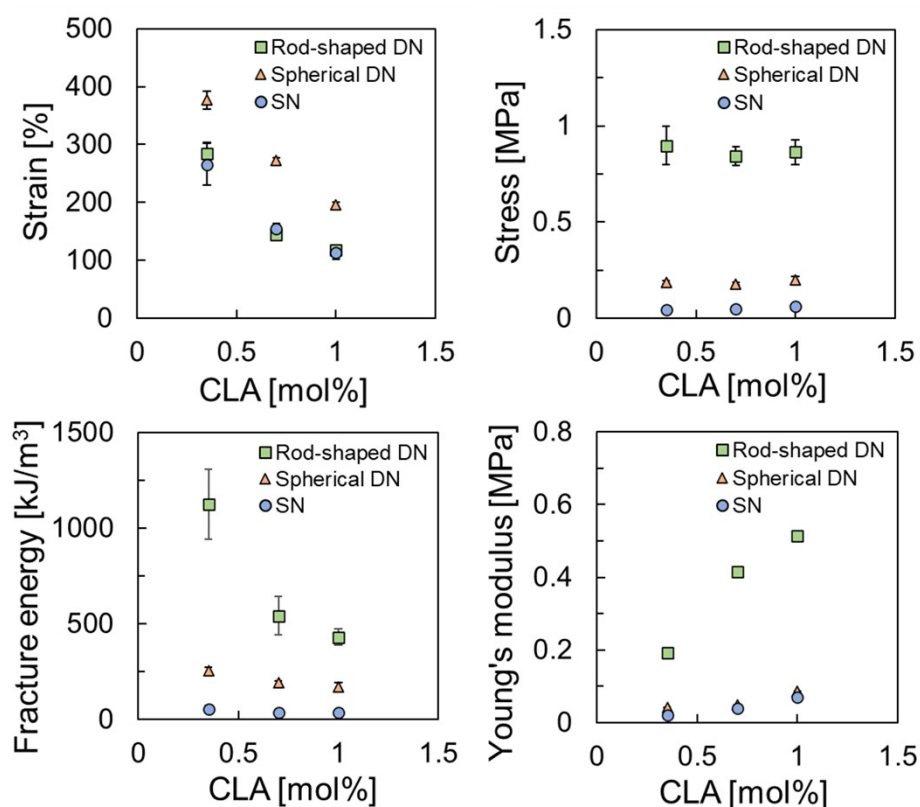

**Figure S5** Mechanical properties of SN ion gels, spherical, and rod-shaped alumina/PIL DN ion gels with different crosslinker concentrations. The alumina concentration was fixed at 8 wt% relative to the PIL network.

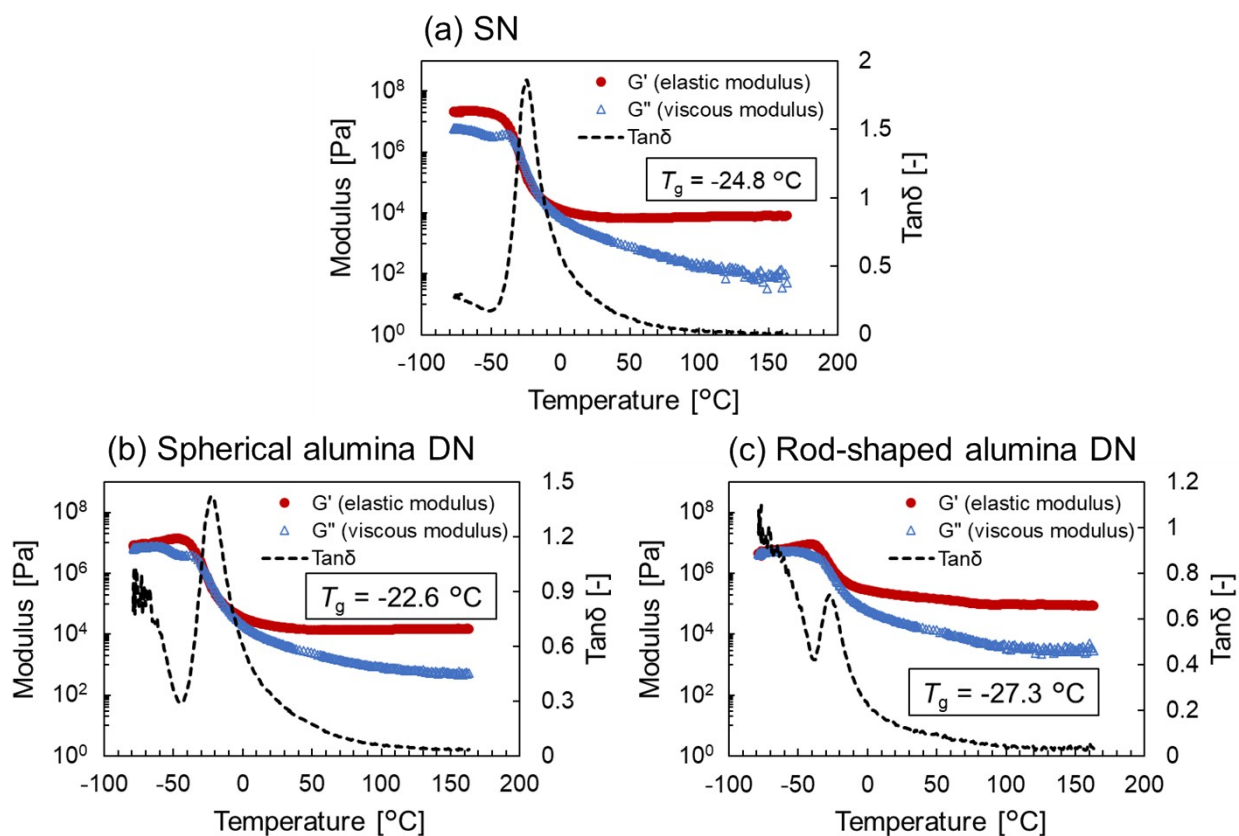

**Figure S6** Oscillatory shear temperature-sweep viscoelasticity measurements of (a) PIL SN, (b) spherical alumina/PIL DN, and (c) rod-shaped alumina/PIL DN ion gels.

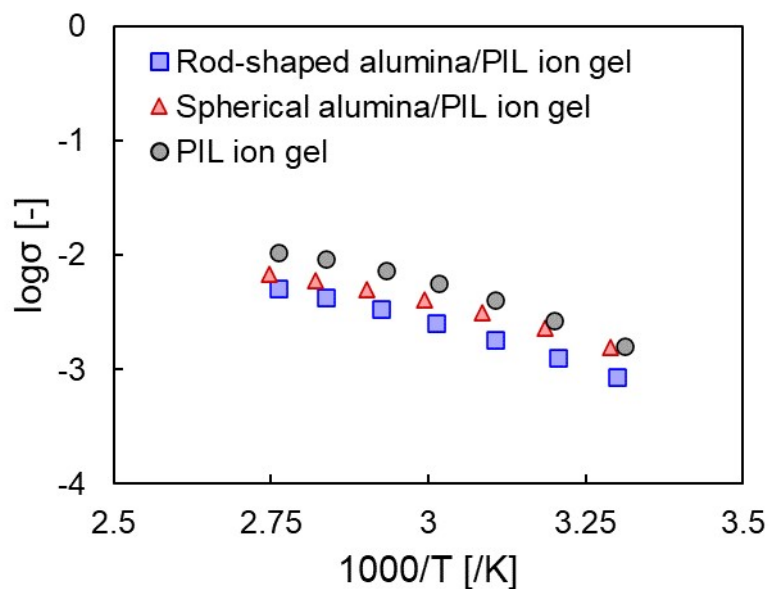

**Figure S7** Ionic conductivity ( $\sigma$ ) of PIL DN ion gels with different shapes of alumina and PIL SN ion gel.
